# Supplementary material for: Glucocorticoid Receptor Regulates and Interacts with LEDGF/p75 to Promote Docetaxel Resistance in Prostate Cancer Cells
Source: MDPI journal article supplement (doi:10.3390/cells12162046), 2023-08-11
Supplement: s1 [file s1]

**Figure S1**

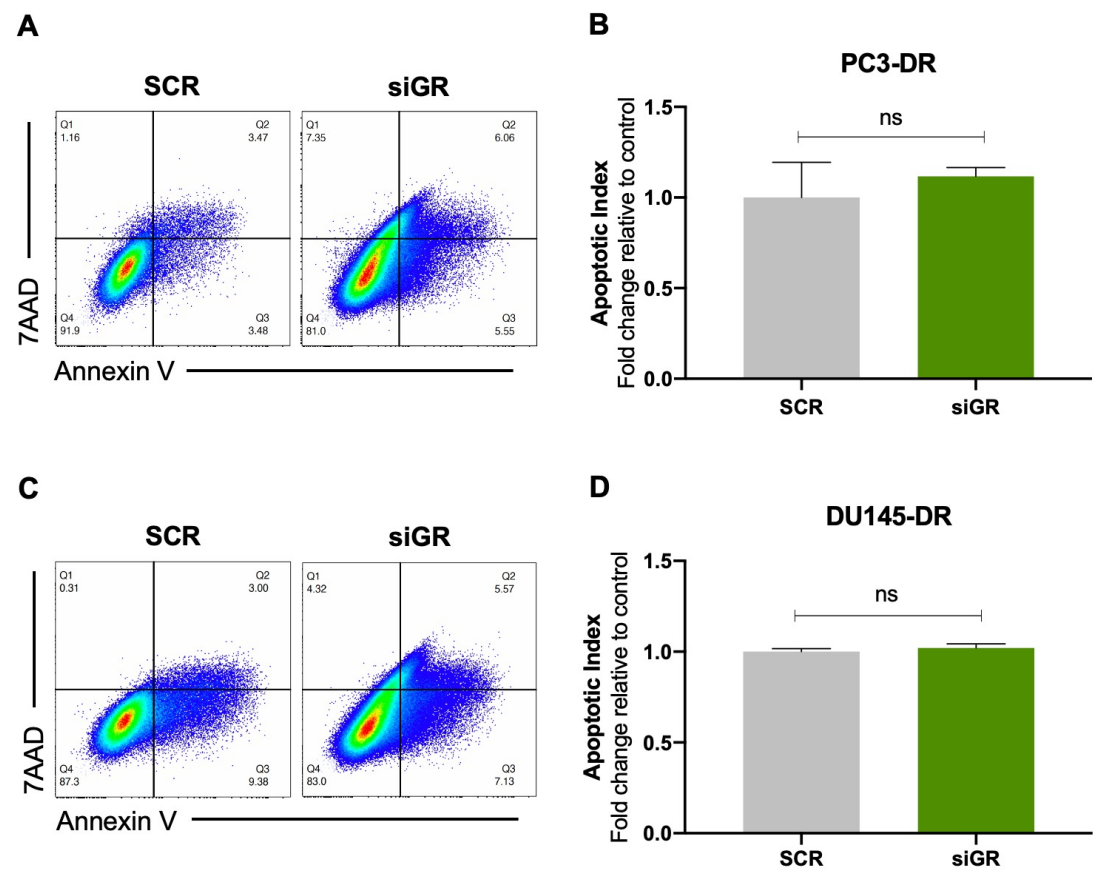

**Figure S1.** Transient GR knockdown does not affect PCa cell survival. siRNA mediated silencing of GR in PC3-DR (A), and DU145-DR (C) demonstrates no cytotoxic effect when comparing SCR negative control to siGR samples. SCR and siGR samples were stained with Annexin V/7AAD to assess cell death through flow cytometry. Representative plots from 3 independent experiments show the apoptotic index (B and D). Statistical analyses were performed using unpaired *t* tests comparing SCR to siGR samples. ns = not significant. Error bars represent mean  $\pm$  SEM from 3 independent experiments for each cell line.

Figure S2

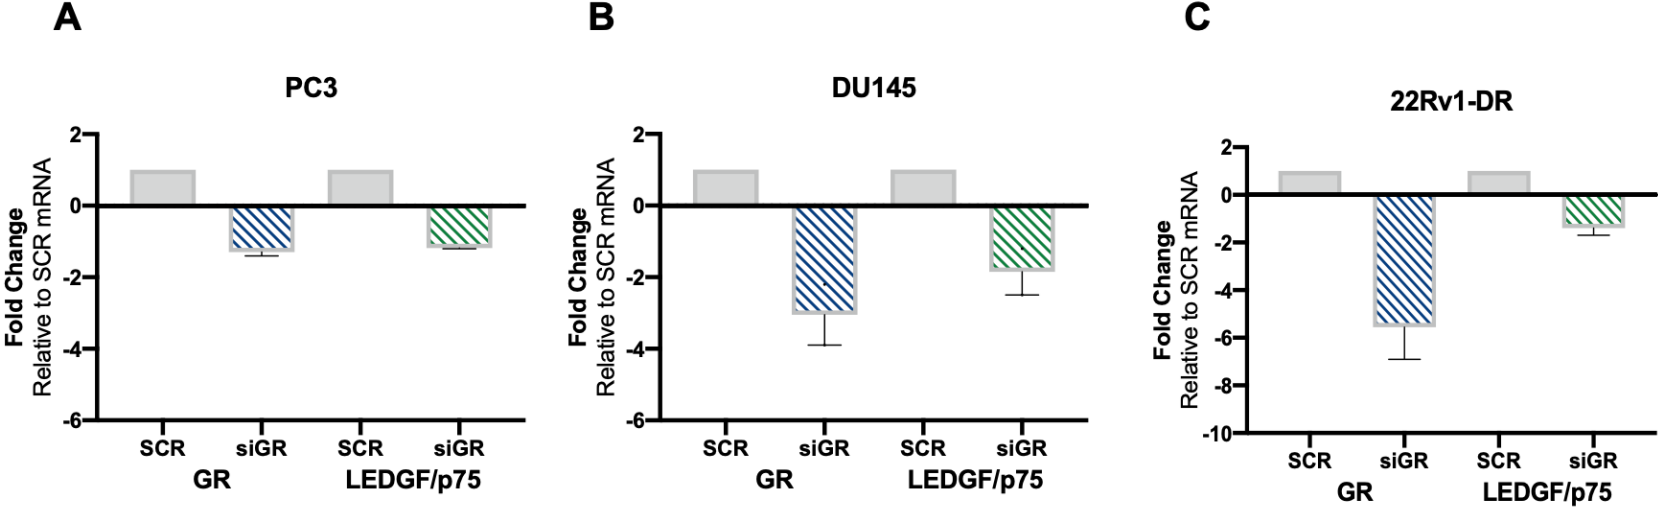

**Figure S2.** Transient GR knockdown decreases both GR and LEDGF/p75 mRNA levels in PCa cells. siRNA-mediated GR silencing was performed in PC3 (A), DU145 (B), and 22Rv1-DR (C) cells for 72h. Total RNA was extracted from PC3, DU145, and 22Rv1-DR cells after siRNA transfections. Gray bars represent SCR negative control, blue bars confirm the GR silencing transcript levels, and green bars show the decreased LEDGF/p75 transcript levels. Data was normalized to SCR negative control mRNA levels. Results represent 2 independent qPCR experiments using three biological replicates per experiment. Error bars represent mean  $\pm$  SEM.

**Figure S3**

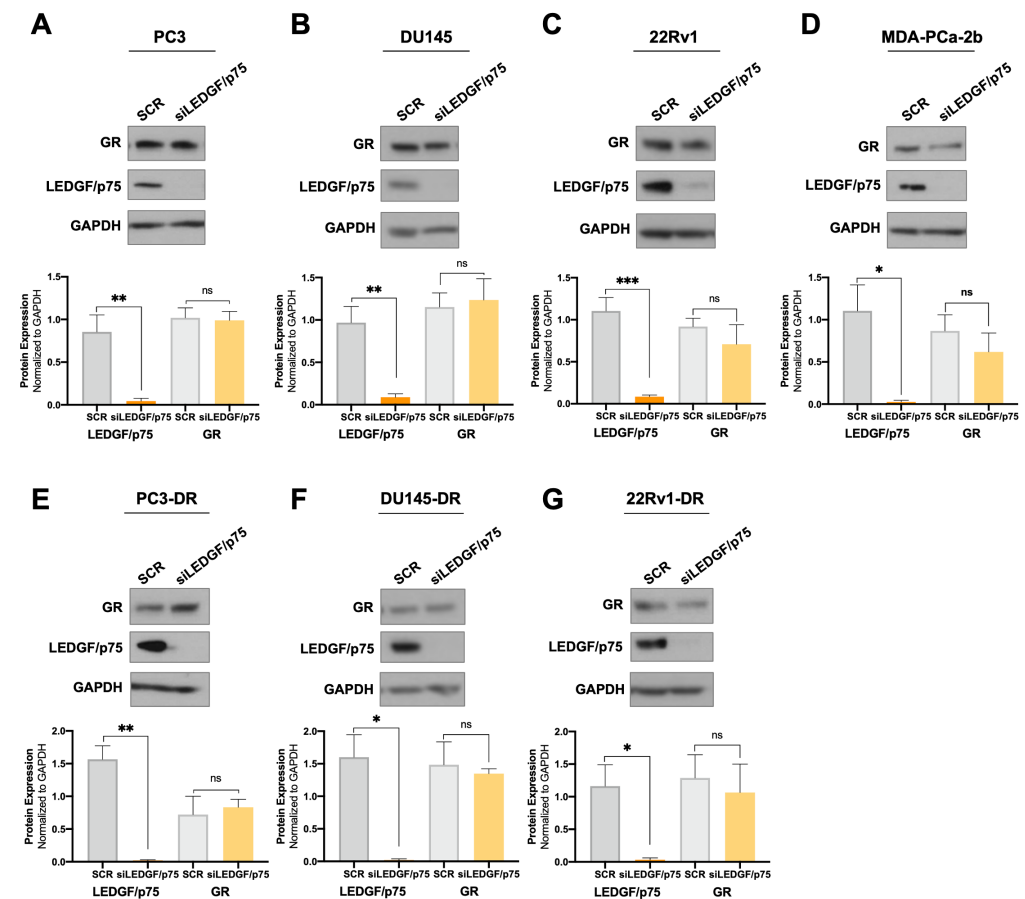

**Figure S3.** LEDGF/p75 silencing has no effect on GR protein expression levels in PCa cells. DTX-sensitive PC3 (A), DU145 (B), 22Rv1 (C), and MDA-PCa-2b (D) cell lines were transfected with siRNAs specific for LEDGF/p75 (siLEDGF/p75) or scrambled negative control oligos (SCR) for 72 h. LEDGF/p75 silencing resulting in no change in GR protein expression was confirmed by immunoblotting. Similar results were observed in the DTX-resistant PCa cell lines PC3-DR (E), DU145-DR (F), and 22Rv1-DR (G). Quantified band values for GR and HRP2 were obtained with ImageJ software and plotted as relative protein expression normalized to GAPDH. Statistical analyses were performed using unpaired *t* tests comparing SCR to siGR samples. \**p* < 0.05, \*\**p* < 0.01. Error bars represent mean  $\pm$  SEM from at least 3 independent experiments for each cell line.

### Figure S4

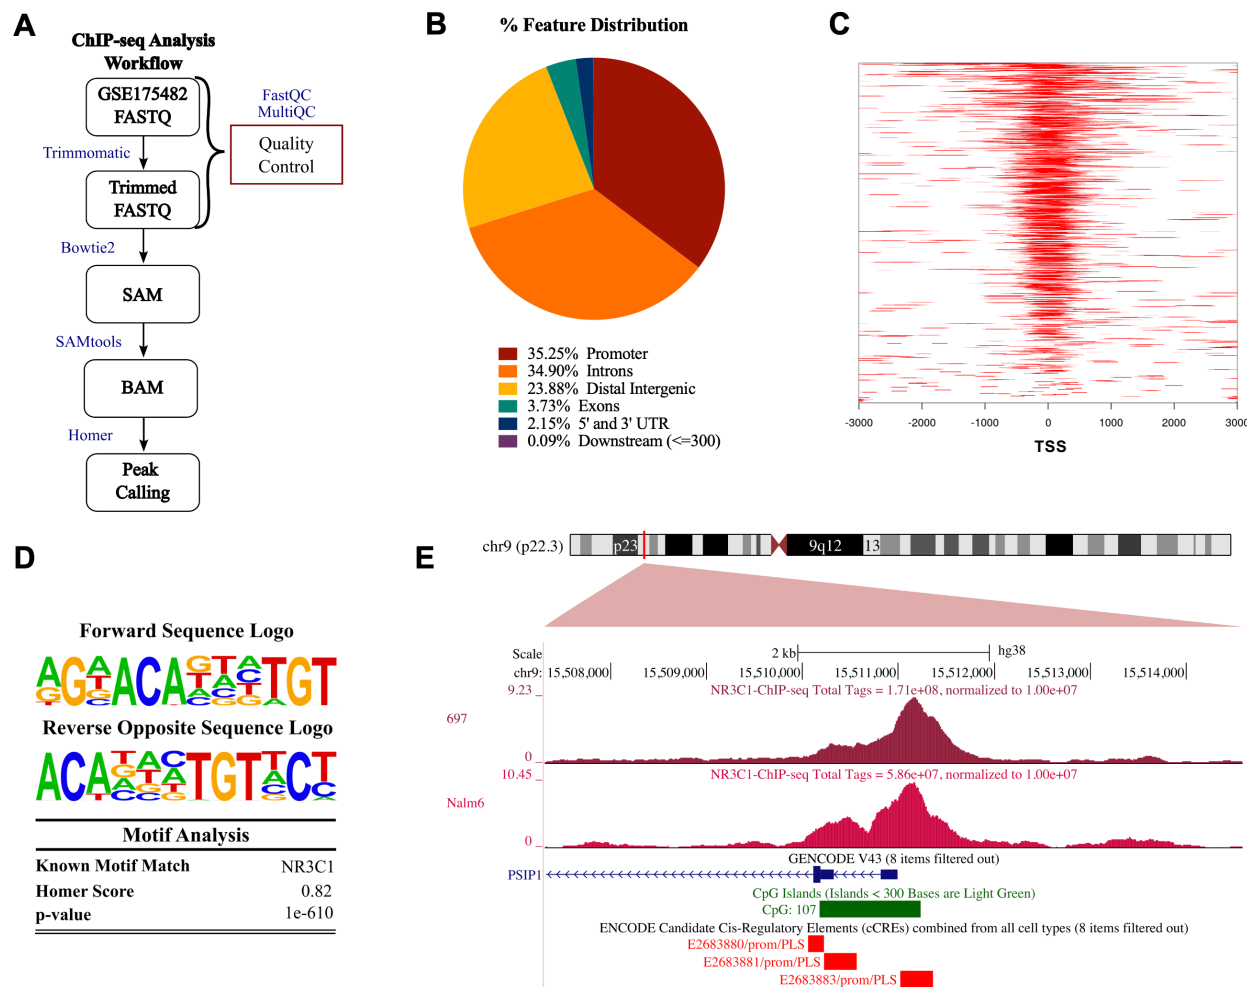

**Figure S4.** GR binding motifs were identified in the promoter region of the gene encoding LEDGF/p75 (*PSIP1*) using ChIP-seq in acute lymphoblastic leukemia (ALL) cell lines. Flow diagram of the analysis pipeline used for the 697 and Nalm6 ChIP samples obtained from the gene expression omnibus (GEO) database (A). Binding sites were distributed among multiple features, with promoters having the highest occurrence (B). Heatmap of ChIP binding to transcription start site (TSS) regions, zero is set as the TSS (C). Near the TSS of *PSIP1*, motif analysis identified a potential GR binding site (D). UCSC genome browser visualization of normalized peaks for *NR3C1* (gene encoding GR) near the TSS of *PSIP1*. ChIP tracks are shown in shades of burgundy, GENCODE *PSIP1* transcript is in blue, CpG islands are in green, and ENCODE promoter-like signatures are in red (E).

**Figure S5**

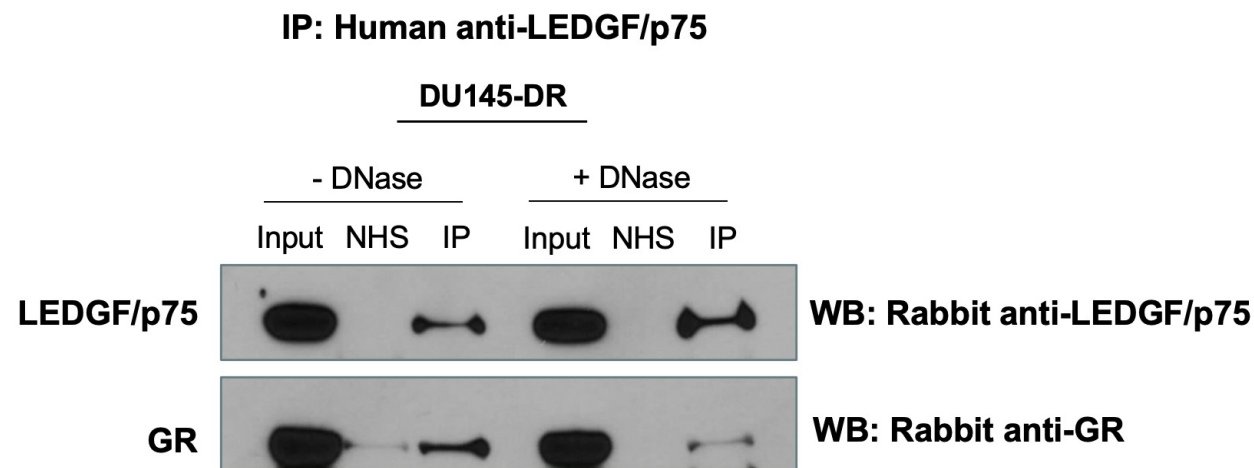

**Figure S5.** The endogenous interaction between LEDGF/p75 and GR interaction is not affected by DNase treatment. Immunoprecipitations were performed using specific human anti-LEDGF/p75 autoantibodies. DNase treatment of cell lysates was performed for 15 mins prior to addition of anti-LEDGF/p75 autoimmune serum or normal human serum (NHS). IP was confirmed by immunoblotting with rabbit monoclonal antibodies specific for either LEDGF/p75 or GR in DU145-DR cells. NHS was used as negative control for IP and whole cell lysates collected from IP reactions were used as input (1% of IP).

**Figure S6**

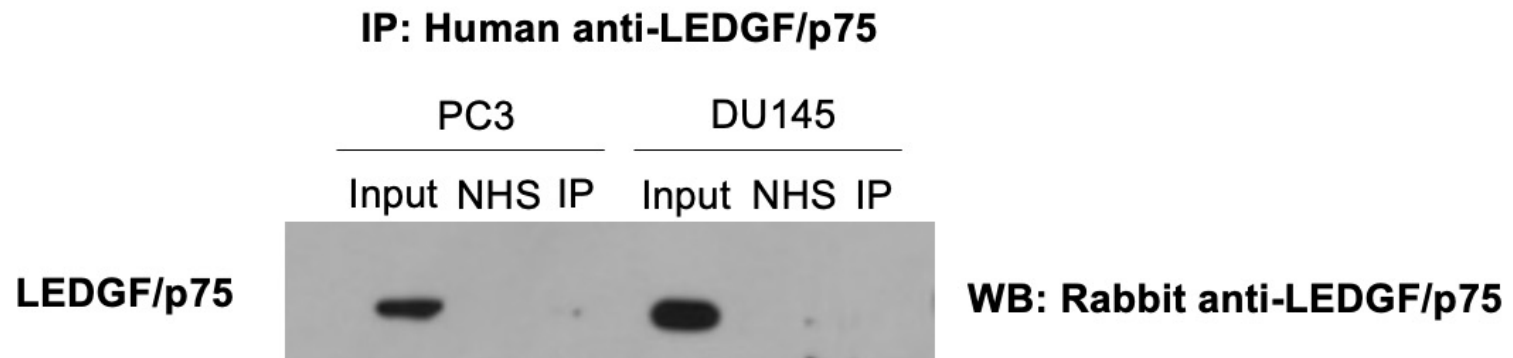

**Figure S6.** LEDGF/p75 immunoprecipitation is not efficient in DTX-sensitive PCa cells. Immunoprecipitations (IP) were performed using specific human anti-LEDGF/p75 autoantibodies. Normal human serum (NHS) was used as negative control for IP and whole cell lysates collected from IP reactions were used as input (1% of IP). IP confirmation was assessed by immunoblotting with rabbit monoclonal antibodies specific for LEDGF/p75 in DTX-sensitive PC3 and DU145 cells and representative immunoblots only show the immunoreactivity against LEDGF/p75 in the input (1% of IP). .

**Figure S7**

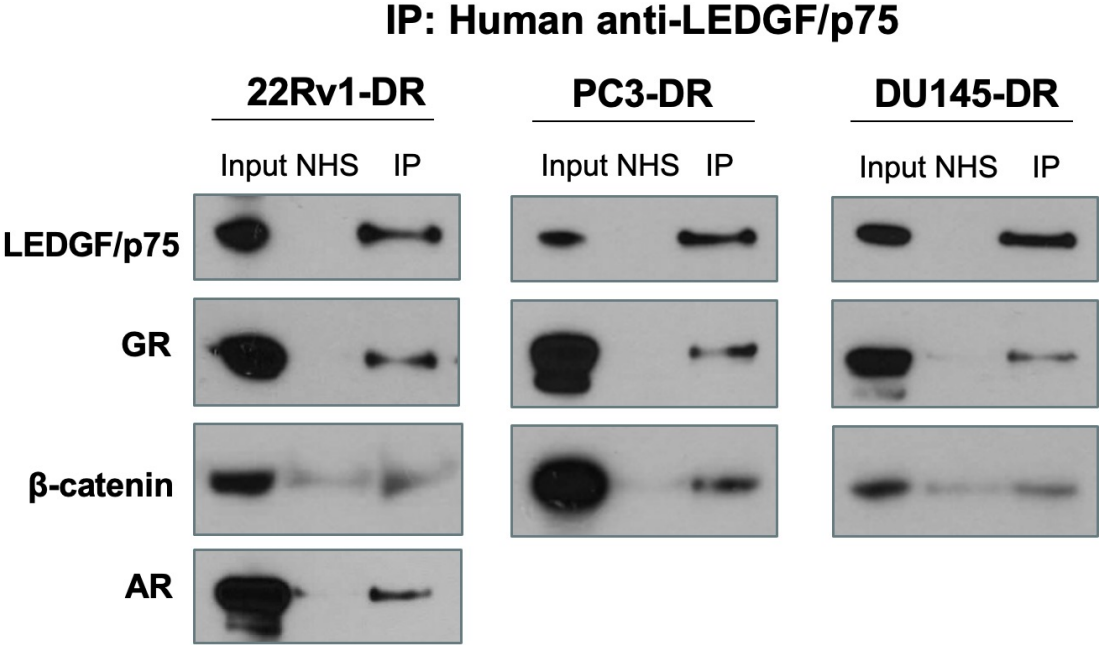

**Figure S7.** LEDGF/p75 and GR endogenously interact with  $\beta$ -catenin and AR in PCa cells. Immunoprecipitations were performed using specific human anti-LEDGF/p75 autoimmune serum. IP was confirmed by immunoblotting with rabbit monoclonal antibodies specific for either LEDGF/p75, GR,  $\beta$ -catenin, or AR in 22Rv1-DR, PC3-DR, or DU145-DR. Normal human serum (NHS) was used as negative control for IP and whole cell lysates collected from IP reactions were used as input (1% of IP). Independent experiments were performed at least 3 times.

Figure S8

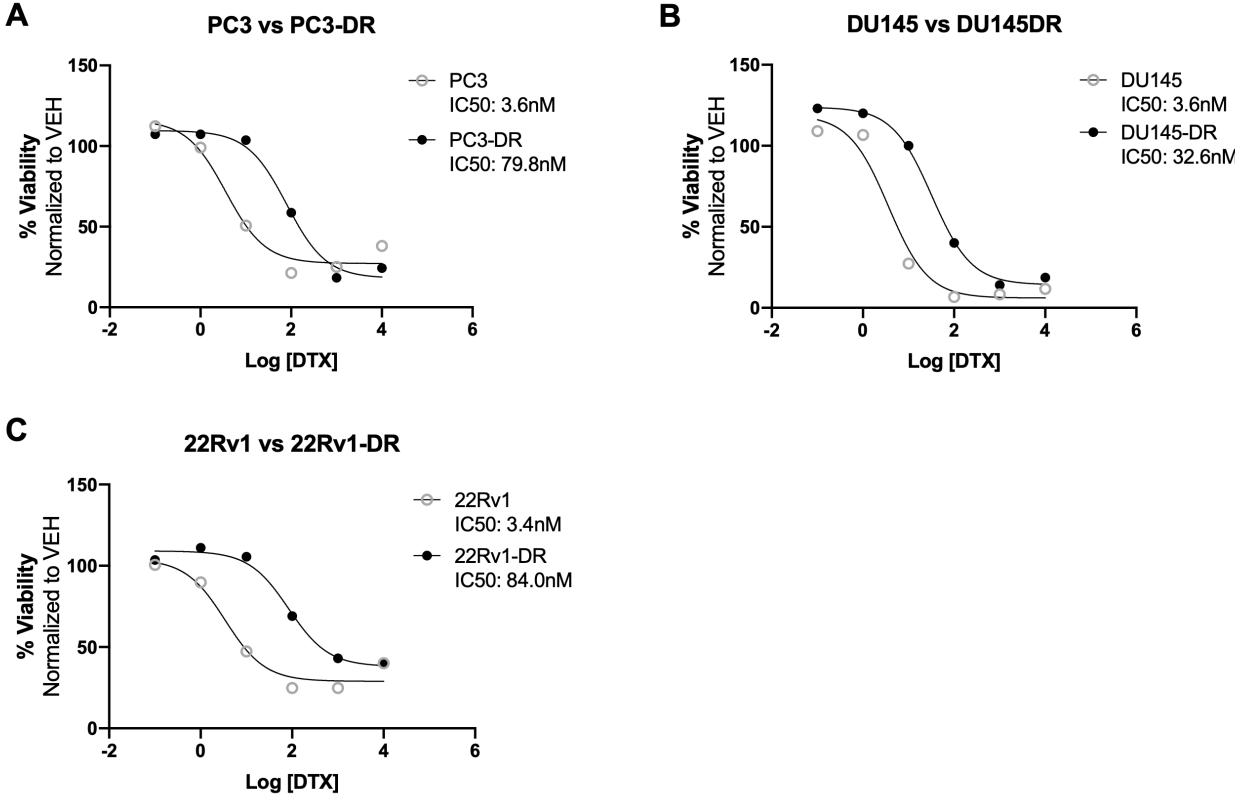

**Figure S8.** Validation of docetaxel-resistance (DR) in PCa cell lines. Docetaxel IC<sub>50</sub> values, determined by MTT assays following drug treatment for 72 hours, are shown for the following parental and DR cell line pairs: (A) PC3 vs PC3-DR, (B) DU145 vs DU145-DR, and 22Rv1 vs 22Rv1-DR. DR cells were generated by continuous exposure to incrementally increasing concentrations of DTX (0.1, 1, 3, 5, 6, 7, 8, 9, 10 nM) until stable (>95%) viability was achieved at 10nM DTX. Data include at least three independent experiments and are represented as mean  $\pm$  SEM.



### Figure S9

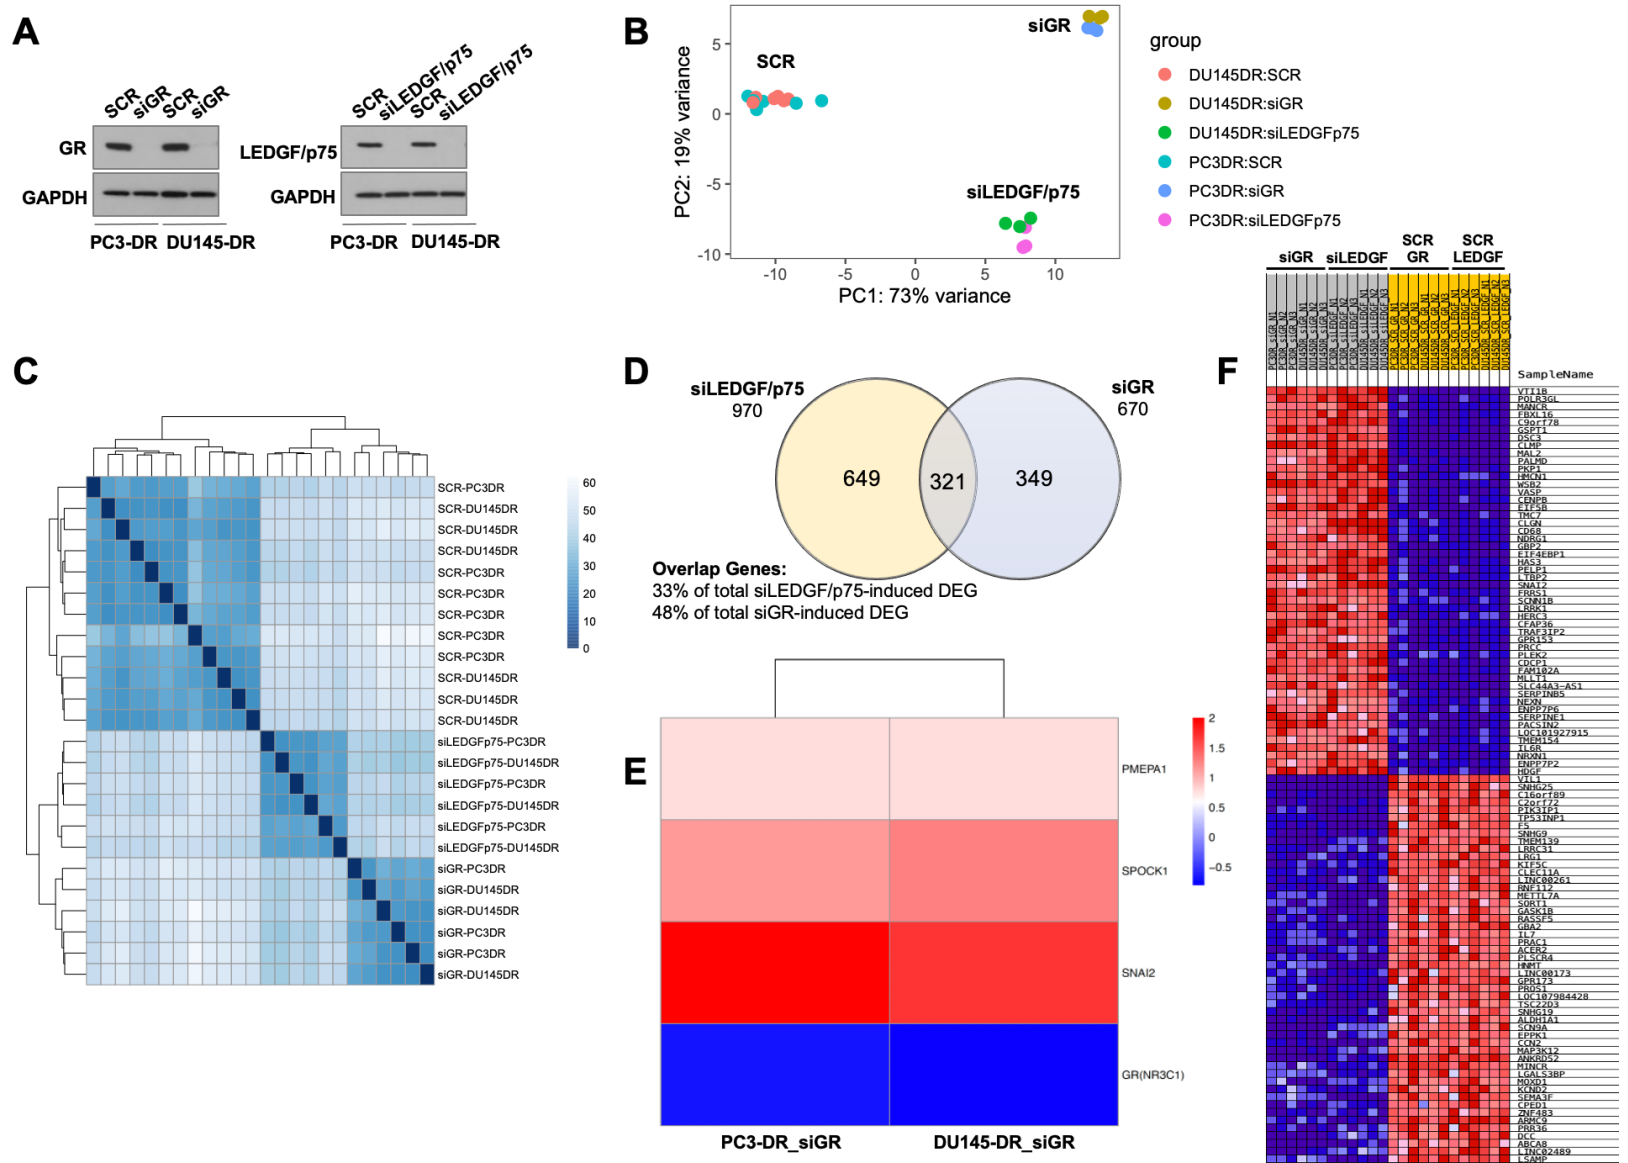

**Figure S9.** RNA-seq data analysis. (A) Representative immunoblots confirming siRNA-mediated GR or LEDGF/p75 silencing in PC3-DR and DU145-DR cells used for the RNA-seq analysis. (B) Principal component analysis (PCA) demonstrating the clustering of scramble (SCR), siLEDGF/p75, and siGR samples from DTX-resistant PCa cells based on gene expression profiles. (C) Correlation plot of SCR, siLEDGF/p75 and siGR samples from DTX-resistant PCa cell lines based on gene expression profiles. (D) Venn Diagram of Differentially Expressed Genes (DEGs) in siLEDGF/p75 or siGR samples from DTX-resistant PCa cell lines. (E) Heat map of *PMEPA1*, *SPOCK1*, *SNAI2* and *NR3C1* (GR) in PC3-DR and DU145-DR cells with GR silencing. (F) GSEA-generated heat map of the top ranked 50 overlap DEGs significantly downregulated (blue) or upregulated (red) by siGR or siLEDGF/p75, compared to SCR controls, in DTX-resistant PC3-DR and DU145-DR cells.
